# Supplementary material
Source: publisher figshare collection journal article supplement (https://gsajournals.figshare.com/ndownloader/files/13549976)
Supplement: Supplementary file 1 [file 13549976]

**Table S1**

**Strains used in this study**

| Strain | Genotype | Reference or source |
| --- | --- | --- |
| YPH499 | *MATa* *ura3–52 lys2–801 ade2–101 trp1-Δ63 his1-Δ200 leu2-Δ1* | (Sikorski and Hieter 1989) |
| YCF101 | YPH499 *PIF1*-MYC13::*TRP1* | (Paeschke *et al.* 2011) |
| YCF103 | YPH499 *RRM3*-MYC13::*TRP1* | (Azvolinsky *et al.* 2006) |
| YCF104 | YPH499 *PIF1*-MYC13::*TRP1* bar1Δ::*NAT* | (Tran *et al.* 2017) |
| YCF105 | YPH499 *RRM3*-MYC13::*TRP1* bar1Δ::*NAT* | (Tran *et al.* 2017) |
| YCF106 | YPH499 *PIF1*-MYC13::*TRP1* bar1Δ::*NAT* rrm3Δ::*HIS3* | (Tran *et al.* 2017) |
| YCF107 | YPH499 *RRM3*-MYC13::*TRP1* bar1Δ::*NAT* pif1-m2::*HPH* | (Tran *et al.* 2017) |
| YCF108 | YPH499 *PIF1*-MYC13::*TRP1* bar1Δ::*NAT* rnh1Δ::*HPH* | (Tran *et al.* 2017) |
| YCF109 | YPH499 *RRM3*-MYC13::*TRP1* bar1Δ::*NAT* rnh1Δ::*HPH* | (Tran *et al.* 2017) |
| YCF110 | YPH499 *PIF1*-MYC13::*TRP1* bar1Δ::*NAT* tof1Δ::*KAN* | This study |
| YCF111 | YPH499 *RRM3*-MYC13::*TRP1* bar1Δ::*NAT* tof1Δ::*KAN* | This study |
| YCF112 | YPH499 bar1Δ::*NAT* rrm3Δ::*HIS3* | This study |
| YCF113 | YPH499 bar1Δ::*NAT* pif1-m2 | This study |
| YCF114 | YPH499 bar1Δ::*NAT* pif1Δ::*KAN* | This study |
| YCF116 | YPH499 bar1Δ::*NAT* rrm3Δ::*HIS3* pif1-m2::*HPH* | This study |
| YCF117 | YPH499 bar1Δ::*NAT* rrm3Δ::*HIS3* pif1Δ::*KAN* | This study |
| YCF118 | YPH499 bar1Δ::*NAT* cbf1Δ::*HPH* | This study |
| YTP15 | MATa *ura3-52::URA3* trp Δ *leu2-3,112 lys2-801am* | (Pohl *et al.* 2012) |
| YTP16 | MATa *ura3-52::URA3* trp Δ *leu2-3,112 lys2-801am met2::CEN7.LEU2 cen14::URA3* | (Pohl *et al.* 2012) |
| YTP19 | MATa *ura3-52::URA3* trp Δ *leu2-3,112 lys2-801am met2::CEN7 (CDEIII:XbaI).LEU2* | (Pohl *et al.* 2012) |
| YTP202 | MATa *ura3-52::URA3* trp Δ *leu2-3,112 lys2-801am PIF1-*MYC13::*TRP* | This study |
| YTP203 | MATa *ura3-52::URA3* trp Δ *leu2-3,112 lys2-801am PIF1-K264A-*MYC13::*TRP* | This study |
| YTP204 | MATa *ura3-52::URA3* trp Δ *leu2-3,112 lys2-801am met2::CEN7.LEU2 cen14::URA3 PIF1-*MYC13::*TRP* | This study |
| YTP205 | MATa *ura3-52::URA3* trp Δ *leu2-3,112 lys2-801am met2::CEN7.LEU2 cen14::URA3 PIF1-K264A-*MYC13::*TRP1* | This study |
| YCF131 | MATa *ura3-52::URA3* trp Δ *leu2-3,112 lys2-801am RRM3-*MYC13::*TRP* | This study |
| YCF132 | MATa *ura3-52::URA3* trp Δ *leu2-3,112 lys2-801am RRM3-K260A-*MYC13::*TRP* | This study |
| YCF133 | MATa *ura3-52::URA3* trp Δ *leu2-3,112 lys2-801am met2::CEN7.LEU2 cen14::URA3 RRM3-*MYC13::*TRP* | This study |
| YCF134 | MATa *ura3-52::URA3* trp Δ *leu2-3,112 lys2-801am met2::CEN7.LEU2 cen14::URA3 RRM3-K260A-*MYC13::*TRP* | This study |
| YCF135 | MATa *ura3-52::URA3* trp Δ *leu2-3,112 lys2-801am met2::CEN7 (CDEIII:XbaI).LEU2 PIF1-*MYC13::*TRP* | This study |
| YCF136 | MATa *ura3-52::URA3* trp Δ *leu2-3,112 lys2-801am met2::CEN7 (CDEIII:XbaI).LEU2 PIF1-K264A-*MYC13::*TRP* | This study |
| YCF137 | MATa *ura3-52::URA3* trp Δ *leu2-3,112 lys2-801am met2::CEN7 (CDEIII:XbaI).LEU2 RRM3-*MYC13::*TRP* | This study |
| YCF138 | MATa *ura3-52::URA3* trp Δ *leu2-3,112 lys2-801am met2::CEN7 (CDEIII:XbaI).LEU2 RRM3-K260A-*MYC13::*TRP* | This study |
